# Supplementary material
Source: Elsevier journal article supplement (https://www.sciencedirect.com/science/article/pii/S0214460320300188)
Supplement: mmc1 [file S0214460320300188:mmc1.pdf]

## ANEXOS

### Anexo A. Cuestionario parental GRECIL

Les agradecemos dediquen un momento de su tiempo para responder el siguiente cuestionario. Esta información es confidencial y se guardará y tratará de forma confidencial.

Conteste, siempre que le sea posible, todas las preguntas formuladas.

Datos padres:

Datos del participante (niño/a):

Datos sociodemográficos:

1. Ingresos aproximados anuales en el hogar:

(a) Menos de 12 000 €/año

(d) Entre 25 000 - 35 000 €/año

(b) Entre 12 000 - 15 000 €/año

(e) Entre 35 000 - 45 000 €/año

(c) Entre 15 000 - 25 000 €/año

(f) Más de 45 000 €/año

2. ¿Tiene vehículo propio en casa?:

(a) no

(c) sí, tenemos más de 2

(b) sí, tenemos 1

3. ¿Vuestro hijo/a tiene una habitación propia para él/ella?

(a) si

(b) no

4. Durante los últimos 12 meses ¿Cuántas veces se han ido de viaje familiar por vacaciones?:

(a) ninguna vez

(c) dos veces

(b) una vez

(d) más de dos veces

5. ¿Cuántos dispositivos electrónicos tienen en casa? (solo contar ordenadores y tabletas:

(a) ninguno

(c) entre 2 y 4

(b) uno

(d) más de 4

Antecedentes familiares:

6. ¿Hay alguien de la familia que haya presentado dificultades de lenguaje o aprendizaje?:

(a) si

(b) no

En caso de afirmativo, indique qué miembro de la familia tiene o ha tenido antecedentes:

En caso de afirmativo, indique qué tipo de dificultad ha tenido o tiene (dificultades de lenguaje, aprendizaje u otras, con o sin diagnóstico, p. ej. TDAH, dislexia, dificultades del lenguaje oral, escrito, comprensión, en matemáticas...):

Información sobre las habilidades lingüísticas de su hijo/a:

7. ¿En qué medida (del 1 al 4) pensáis que tiene su hijo/a dificultades en los siguientes aspectos del lenguaje?:

|                                                                                                                   | Sin<br>dificultad<br>(1) | Pocas<br>dificultades<br>(2) | Bastantes<br>dificultades<br>(3) | Muchas<br>dificultades<br>(4) |
|-------------------------------------------------------------------------------------------------------------------|--------------------------|------------------------------|----------------------------------|-------------------------------|
| Fonología (pronunciación de sonidos y palabras)                                                                   | <input type="checkbox"/> | <input type="checkbox"/>     | <input type="checkbox"/>         | <input type="checkbox"/>      |
| Semántica (la comprensión del significado de las palabras)                                                        | <input type="checkbox"/> | <input type="checkbox"/>     | <input type="checkbox"/>         | <input type="checkbox"/>      |
| Morfosintaxis (orden de la palabras, uso de los morfemas de pasado/presente, singular/plural, femenino/masculino) | <input type="checkbox"/> | <input type="checkbox"/>     | <input type="checkbox"/>         | <input type="checkbox"/>      |

1            Léxico (el vocabulario que                                    ☐                                    ☐                                    ☐                                    ☐  
2            presenta)

3  
4            Pragmática (el uso que hace del                                    ☐                                    ☐                                    ☐                                    ☐  
5            lenguaje según el contexto (para  
6            cada apartado  
7  
8  
9

10  
11  
12  
13  
14  
15  
16  
17  
18  
19  
20  
21  
22  
23  
24  
25  
26  
27  
28  
29  
30  
31  
32  
33  
34  
35  
36  
37  
38  
39  
40  
41  
42  
43  
44  
45  
46  
47  
48  
49  
50  
51  
52  
53  
54  
55  
56  
57  
58  
59  
60  
61  
62  
63  
64  
65

## **Anexo B. Transformación de variables de 6 categorías en 3 categorías**

### **Nivel económico** (Ingresos familiares totales en último año)

1. Nivel económico bajo: Entre menos de 12.000 €/año y 15.000 €/año
2. Nivel económico medio: Entre 15.000 €/año y 35.000 €/año
3. Nivel económico medio Entre 35 000 €/año y 45.000 €/año

### **Nivel de Educación madre / Educación padre**

1. Educación madre nivel bajo: (Educación Primaria o Graduado escolar/ESO).
2. Educación madre nivel medio: (Bachillerato / Ciclo Formativo (medio o superior)
3. Educación madre nivel alto (Grado universitario, Máster, doctorado)

**Escala de poder adquisitivo familiar (*Family Affluence Scale, FAS*):** número de vehículos, si el hijo/a tenía habitación propia, vacaciones por año y número de dispositivos electrónicos en el hogar

1. FAS bajo
2. FAS medio
3. FAS alto
